# Supplementary material for: Whole Genome Classification and Phylogenetic Analyses of Rotavirus B strains from the United States
Source: MDPI journal article supplement (doi:10.3390/pathogens7020044), 2018-04-18

Figure S1. Nucleotide pairwise identity frequency graphs of rotavirus B genes. The cutoff values are represented by dashed blue lines.

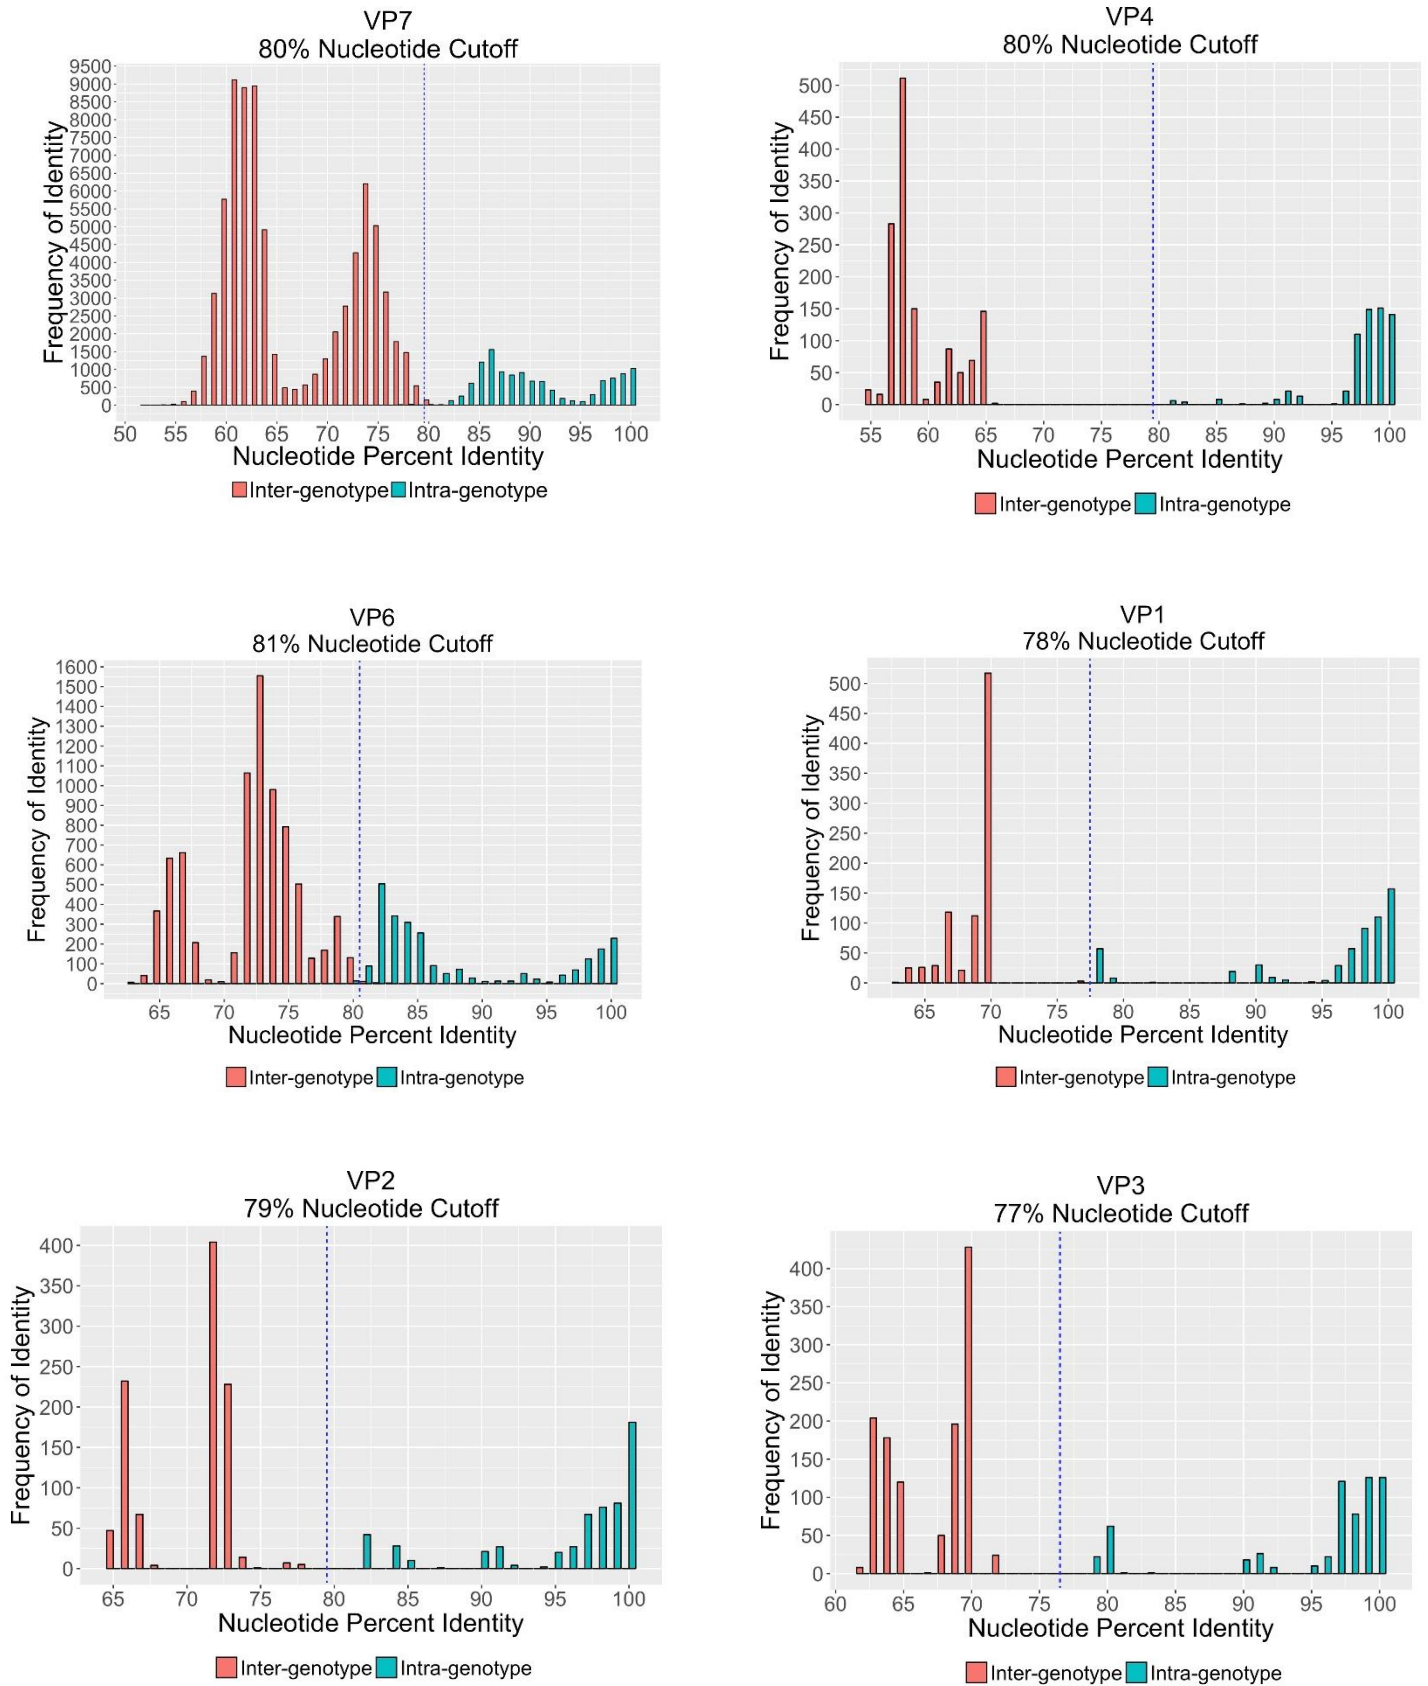

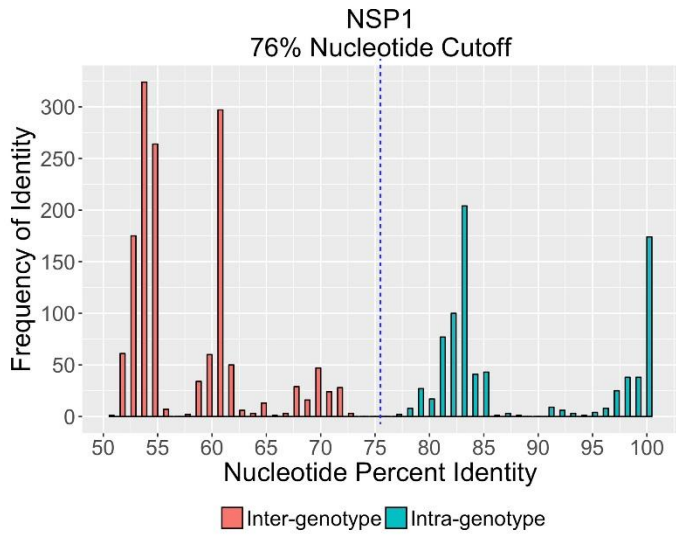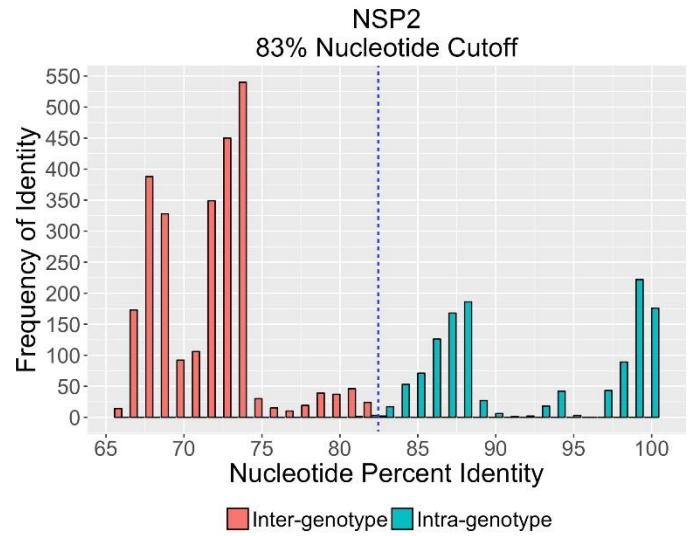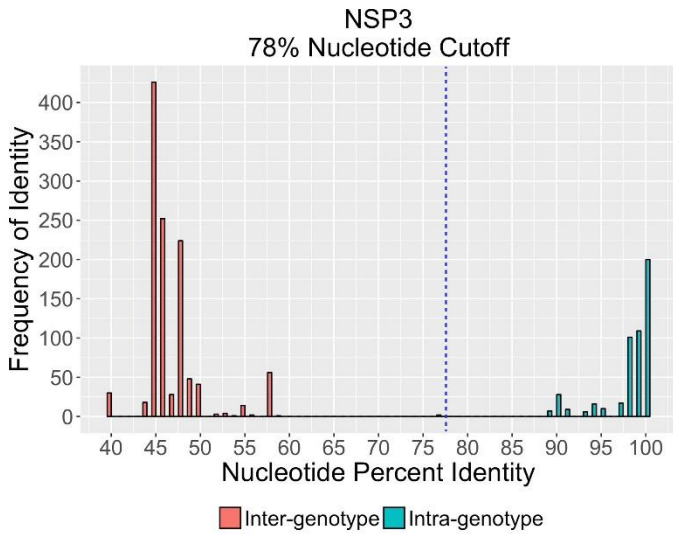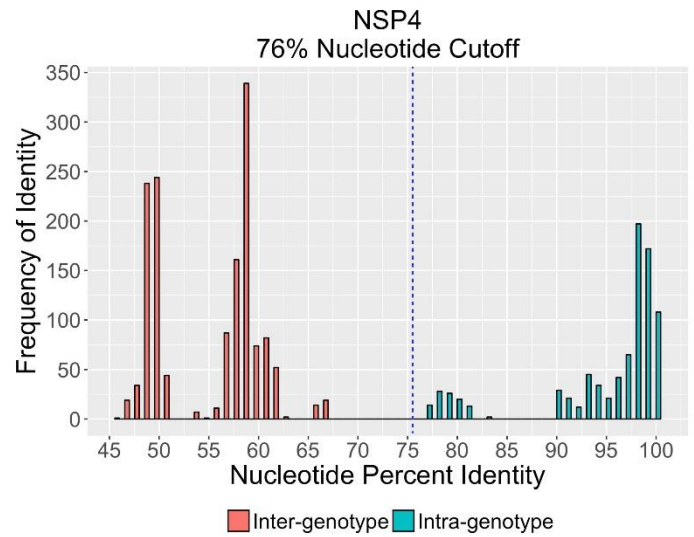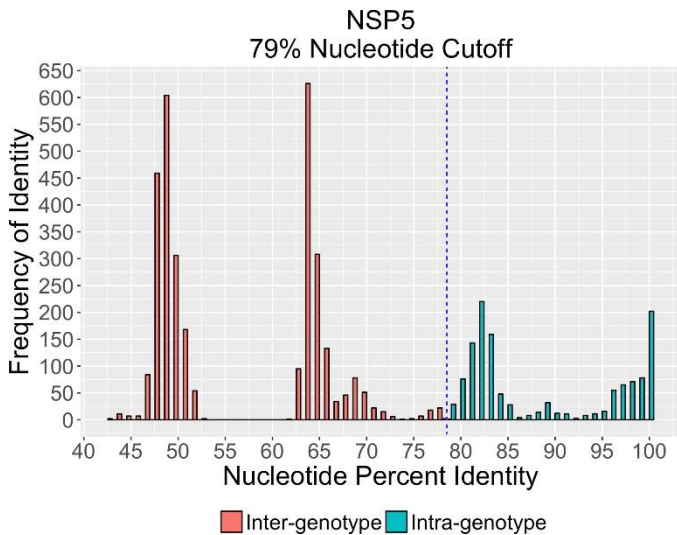

Supplement: s1 [file s1]
